# Supplementary material for: Evaluation of Homology-Independent CRISPR-Cas9 Off-Target Assessment Methods
Source: PubMed Central journal article supplement — CRISPR J. 2020 Dec 18;3(6):440–53. doi: 10.1089/crispr.2020.0053 (PMC7757695; doi:10.1089/crispr.2020.0053), 2020-12-18
Supplement: Supp_FigS1.pdf [file Supp_FigS1.pdf]

**A**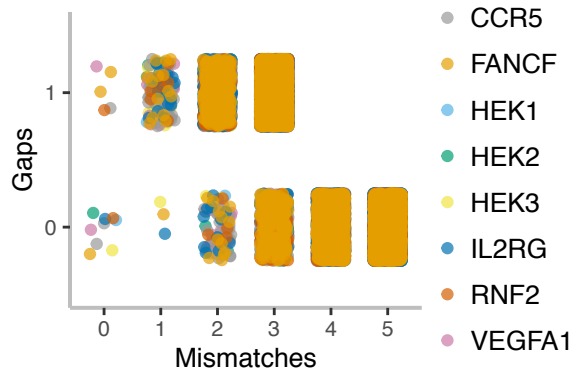**B**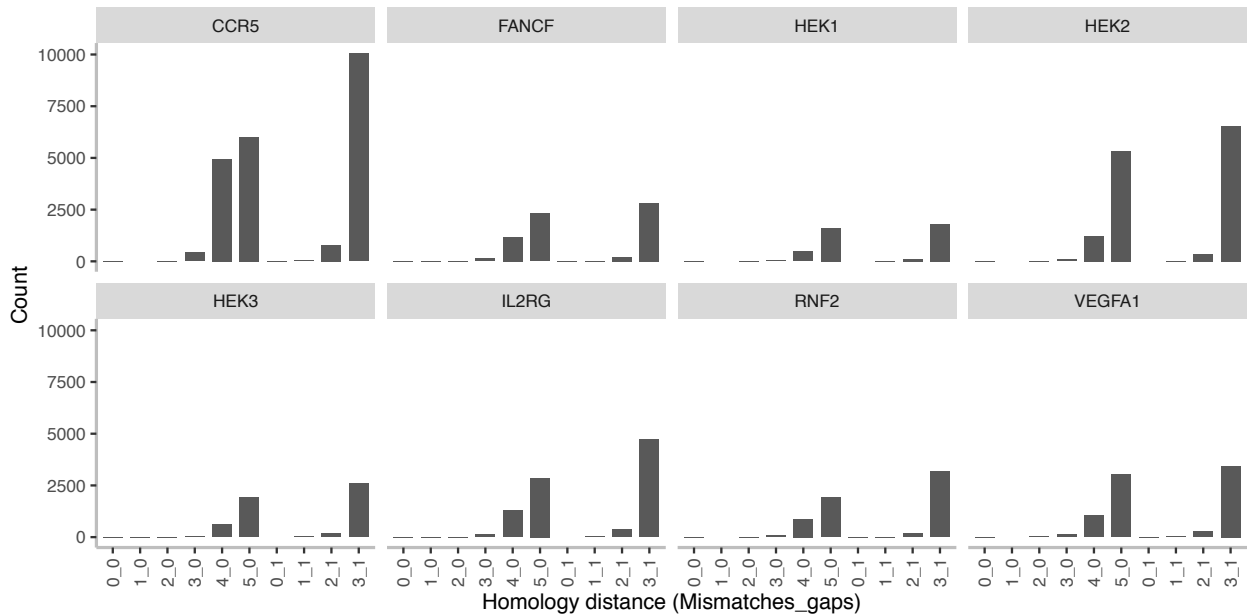

**Supplementary Fig. S1: A)** Sites with up to 5 MM with 0 gaps or with up to 3 MM with 1 gap for eight gRNAs were interrogated with hybrid capture enrichment followed by sequencing. **B)** Number of bioinformatically predicted sites at different mismatch\_gap homology distances for eight gRNAs used in this study.
