# Supplementary material for: Evaluation of Homology-Independent CRISPR-Cas9 Off-Target Assessment Methods
Source: PubMed Central journal article supplement — CRISPR J. 2020 Dec 18;3(6):440–53. doi: 10.1089/crispr.2020.0053 (PMC7757695; doi:10.1089/crispr.2020.0053), 2020-12-18
Supplement: Supp_FigS2.pdf [file Supp_FigS2.pdf]

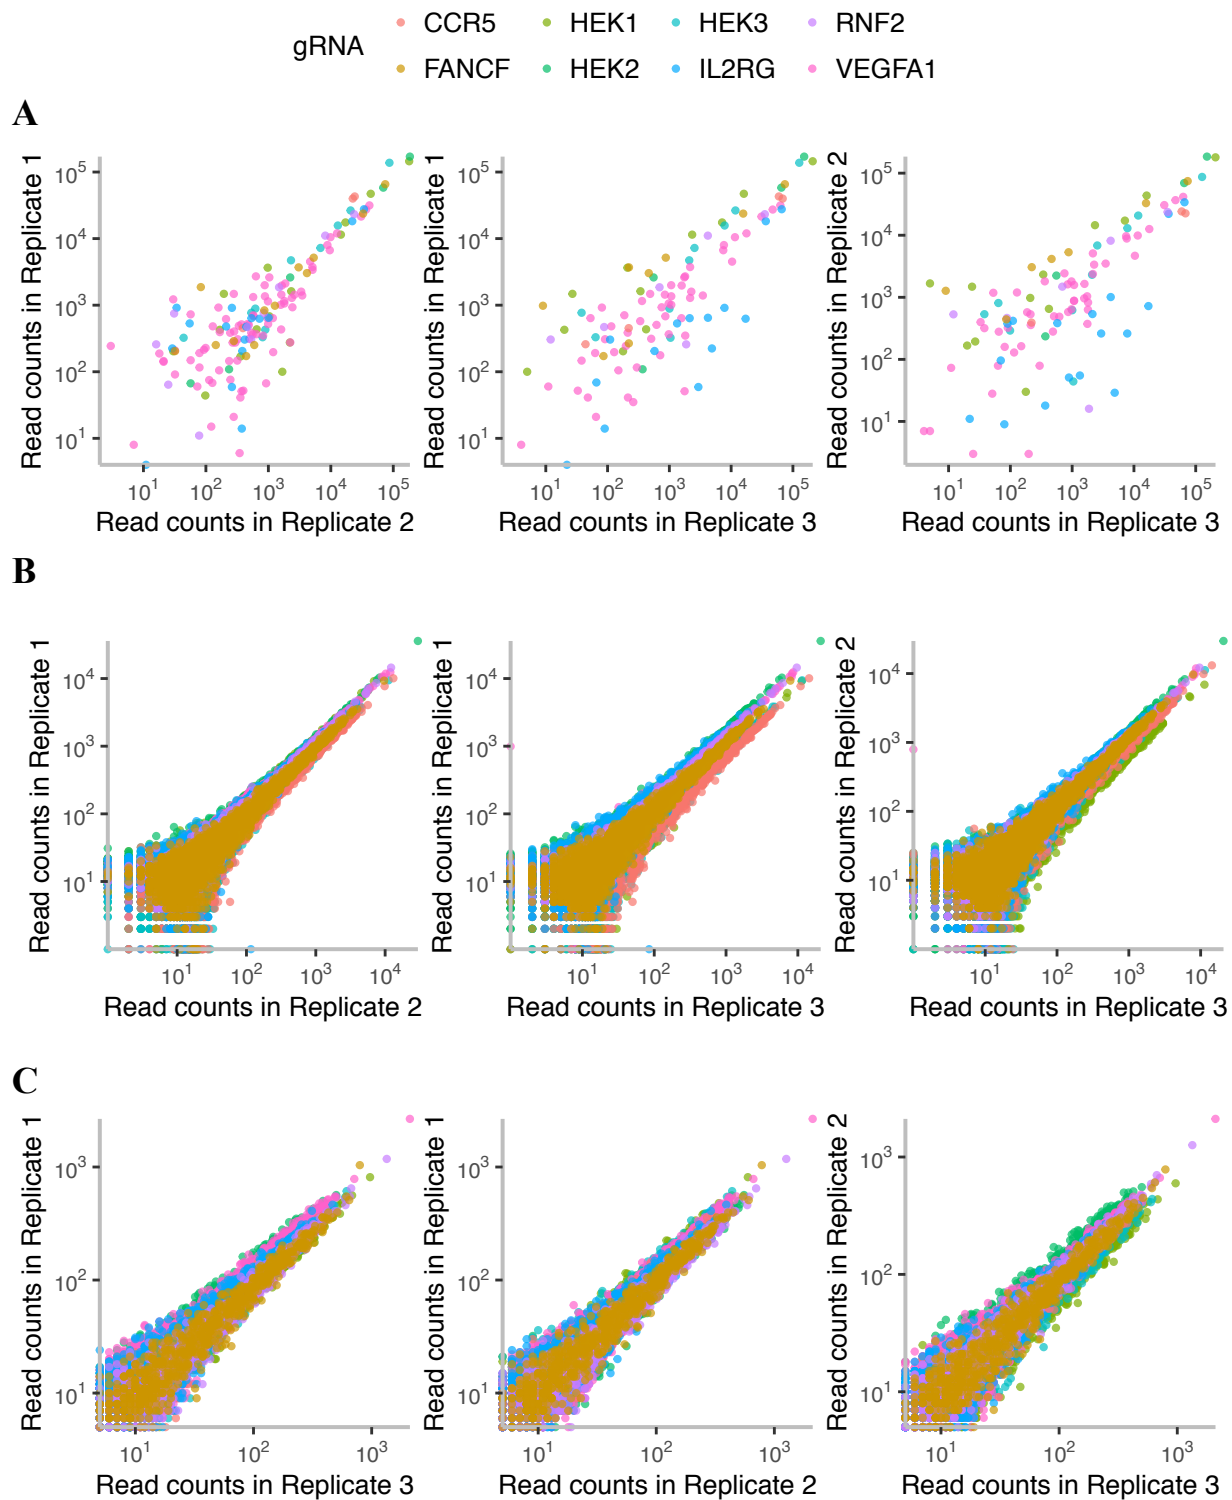

**Supplementary Fig. S2:** Correlation between read counts of nominated sites between two replicates for **A)** GUIDE-seq ( $R^2 = 0.54 - 0.67$ ) **B)** CIRCLE-seq ( $R^2 = 0.80 - 0.83$ ) and **C)** SITE-seq ( $R^2 = 0.90 - 0.91$ )
