# Supplementary material for: Evaluation of Homology-Independent CRISPR-Cas9 Off-Target Assessment Methods
Source: PubMed Central journal article supplement — CRISPR J. 2020 Dec 18;3(6):440–53. doi: 10.1089/crispr.2020.0053 (PMC7757695; doi:10.1089/crispr.2020.0053), 2020-12-18
Supplement: Supp_FigS3.pdf [file Supp_FigS3.pdf]

**A**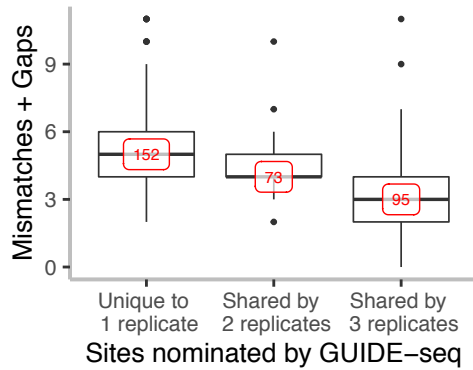**B**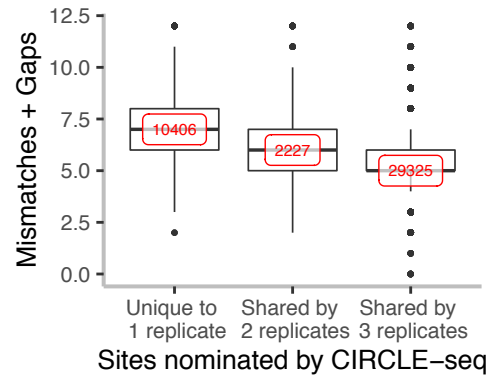**C**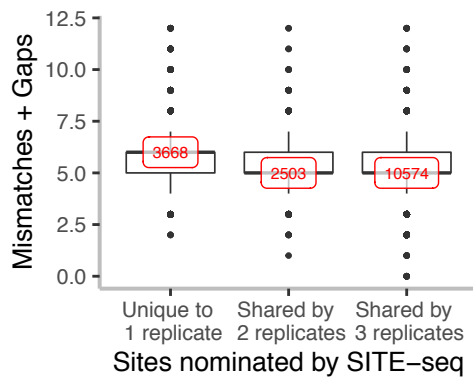

**Supplementary Fig. S3:** Edit distances (mismatches + gaps) of site nominated by single or multiple replicates of homology-independent nomination methods across eight gRNAs are shown for **A)** GUIDE-seq **B)** CIRCLE-seq and **C)** SITE-seq. The x-axis represents overlap within the replicates of the genome-wide assays. The y-axis shows the edit distances. The distribution of edit distances for sites nominated by all three replicates (3<sup>rd</sup> box in each plot) were significantly different from the distributions of edit distances for sites nominated by one or two replicates (1<sup>st</sup> and 2<sup>nd</sup> box in each plot) for all three methods (Wilcoxon  $P$ -value < 0.05).
