# Supplementary material for: Evaluation of Homology-Independent CRISPR-Cas9 Off-Target Assessment Methods
Source: PubMed Central journal article supplement — CRISPR J. 2020 Dec 18;3(6):440–53. doi: 10.1089/crispr.2020.0053 (PMC7757695; doi:10.1089/crispr.2020.0053), 2020-12-18
Supplement: Supp_FigS4.pdf [file Supp_FigS4.pdf]

**A**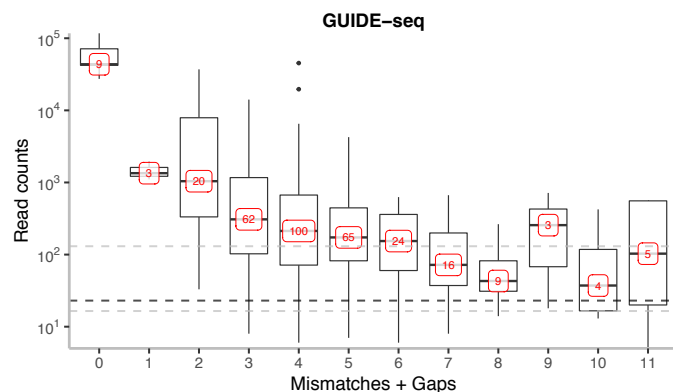**B**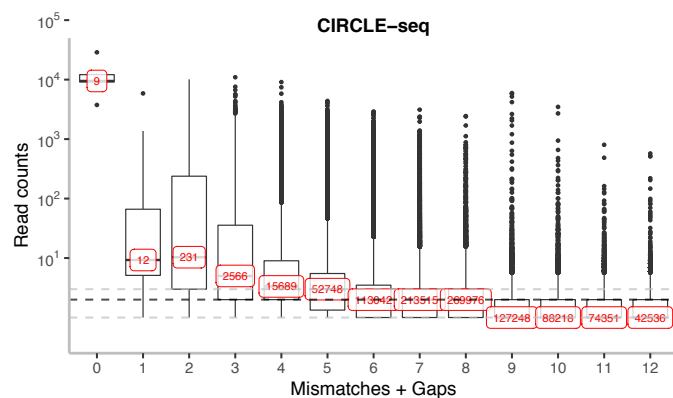**C**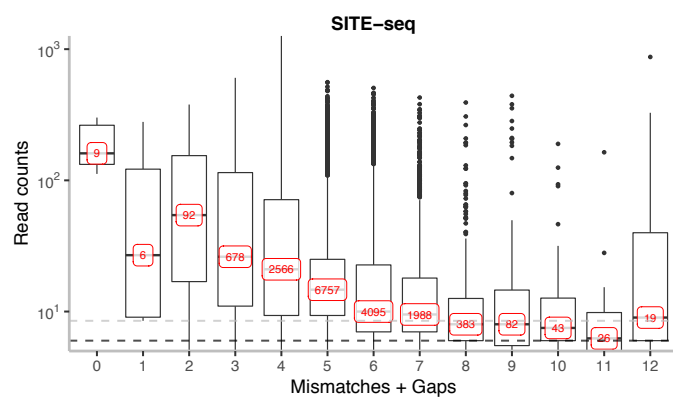

**Supplementary Fig. S4:** Distributions of reads counts by edit distance (mismatches + gaps) between the gRNA and nominated off-target sites for **A)** GUIDE-seq **B)** CIRCLE-seq and **C)** SITE-seq, with no read thresholding applied for all three assays. Numbers in red indicate the number of nominated sites that have a certain edit distance with respect to the gRNA sequence. Dashed horizontal black lines depict average reads in untreated control samples, and dashed grey horizontal lines depict 25% and 75% quartiles of read counts in untreated control samples.
