# Supplementary material for: Evaluation of Homology-Independent CRISPR-Cas9 Off-Target Assessment Methods
Source: PubMed Central journal article supplement — CRISPR J. 2020 Dec 18;3(6):440–53. doi: 10.1089/crispr.2020.0053 (PMC7757695; doi:10.1089/crispr.2020.0053), 2020-12-18
Supplement: Supp_FigS6.pdf [file Supp_FigS6.pdf]

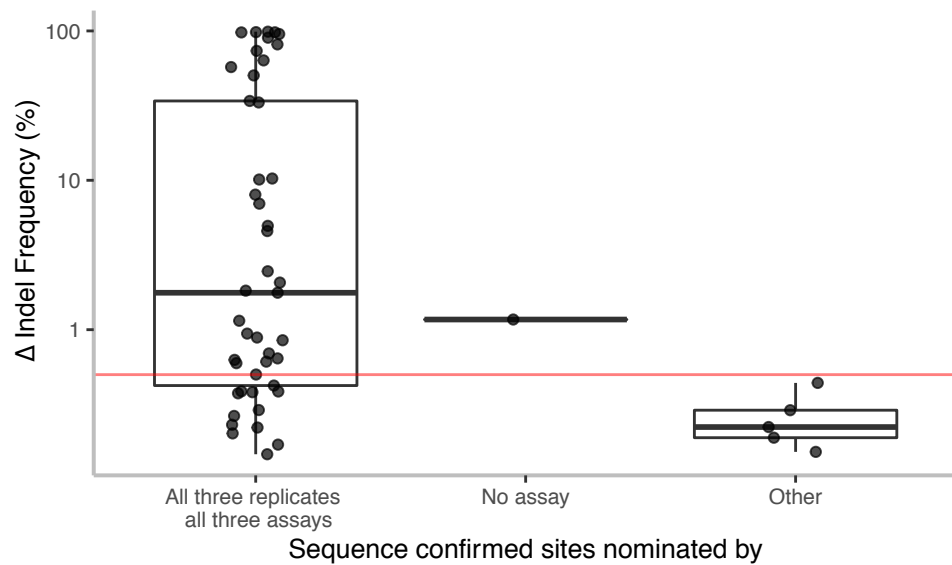

**Supplementary Fig. S6:** Average indel frequency (%) differences between treated and control samples for 51 edited sites grouped by nomination in genome-wide assays. The first box contains sites nominated by all three replicates of all three genome-wide assays (n = 45). The second box contains the one site not nominated by any genome-wide assay. The third box has sites that were nominated by fewer than 3 replicates of one or more genome-wide assays (n= 5). Red line denotes 0.5% indel frequency difference.
