# Supplementary material for: Evaluation of Homology-Independent CRISPR-Cas9 Off-Target Assessment Methods
Source: PubMed Central journal article supplement — CRISPR J. 2020 Dec 18;3(6):440–53. doi: 10.1089/crispr.2020.0053 (PMC7757695; doi:10.1089/crispr.2020.0053), 2020-12-18
Supplement: Supp_FigS7.pdf [file Supp_FigS7.pdf]

|                 |                                             |             |      |      |     |      |     |     |
|-----------------|---------------------------------------------|-------------|------|------|-----|------|-----|-----|
|                 |                                             | CutSite     |      |      |     |      |     |     |
| gRNA            | G T G T T C A T C T T T G G T T T T G T     |             |      |      |     |      |     |     |
| Off-target site | G T T T T C A T - T T T T G T T T T T A G G |             |      |      |     |      |     |     |
| Indel species   |                                             | . . . . .   | 1738 | 1817 | 440 | 1541 | 332 | 515 |
|                 |                                             | - . . . .   | 0    | 0    | 15  | 0    | 0   | 0   |
|                 |                                             | - . . . A . | 0    | 0    | 1   | 0    | 0   | 0   |

**Supplementary Fig. S7:** Indel species observed in HEK293T/Cas9 cells for a sequence-confirmed off-target site for CCR5 gRNA that was not nominated by any genome-wide assays. Top row shows the gRNA sequence. Second row shows the alignment of the off-target site with the gRNA sequence. Read counts in three replicates of treated (Rep1, Rep2, Rep3) and untreated (Mock1, Mock2, Mock3) samples are shown on the right. Unedited reads were observed in all six samples. The two indel species (deletion and mismatch in a homopolymeric stretch) were only detected in the third replicate of the treated sample.
