# Supplementary material for: Evaluation of Homology-Independent CRISPR-Cas9 Off-Target Assessment Methods
Source: PubMed Central journal article supplement — CRISPR J. 2020 Dec 18;3(6):440–53. doi: 10.1089/crispr.2020.0053 (PMC7757695; doi:10.1089/crispr.2020.0053), 2020-12-18
Supplement: Supp_FigS8.pdf [file Supp_FigS8.pdf]

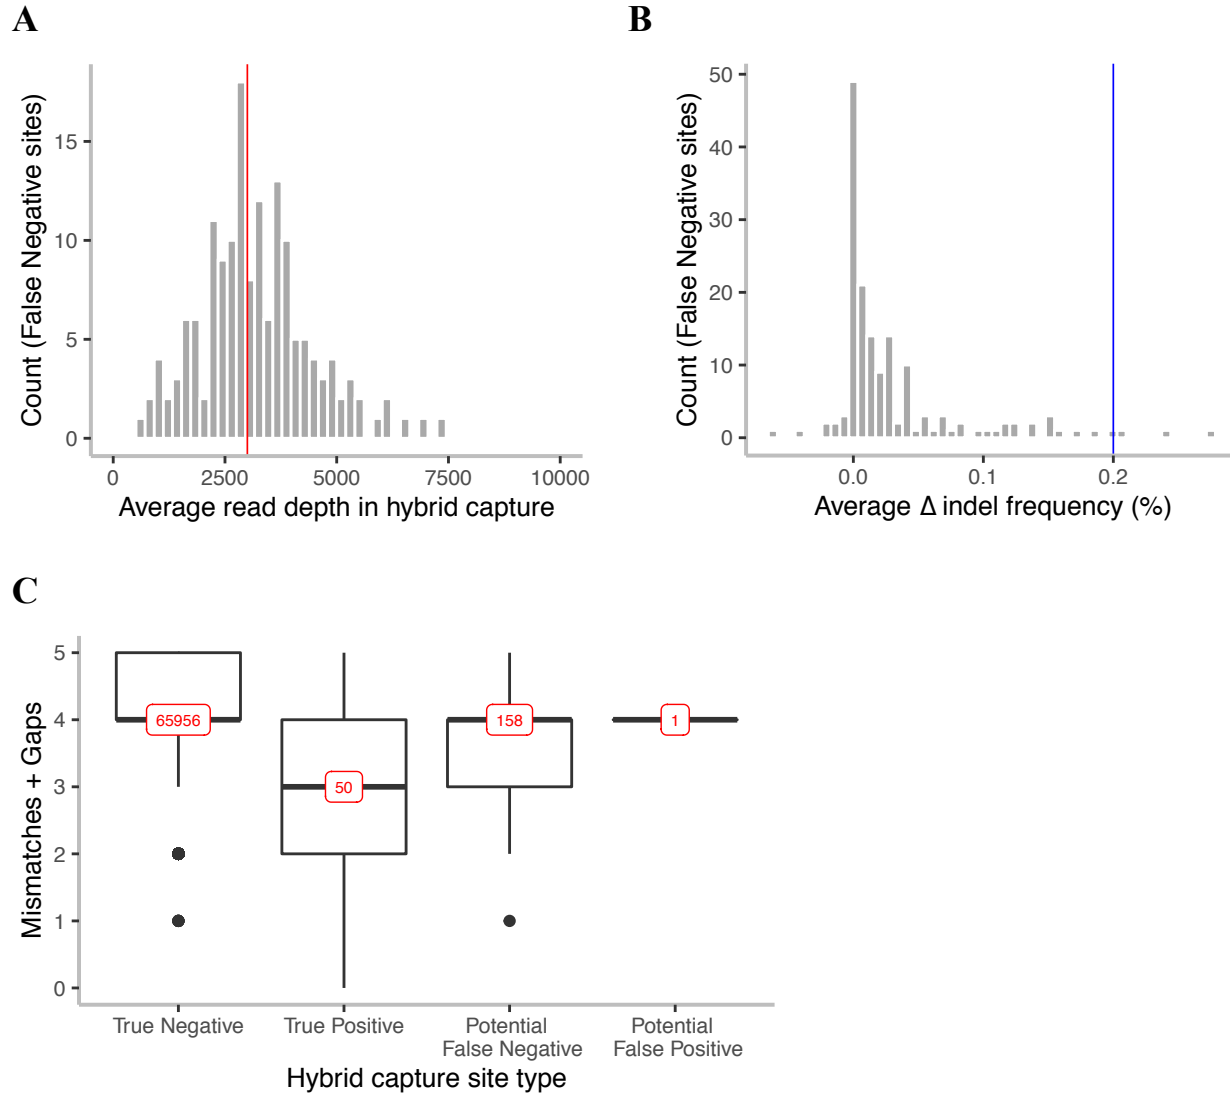

**Supplementary Fig. S8:** **A)** Read depth from hybrid capture sequencing in HEK293T/Cas9 cells for 158 sites that were nominated by all three genome-wide assays but not sequence-confirmed as edited by hybrid capture, averaged across three replicates of treated and untreated samples. Red line denotes median of 3000 reads. **B)** Average difference in indel frequency between treated samples and untreated controls in HEK293T/Cas9 cells for 158 sites across eight gRNAs that were nominated by all three genome-wide assays but not sequence-confirmed as edited by hybrid capture. Blue line marks 0.2% indel frequency difference. **C)** Edit distances for all sites sequenced after hybrid capture enrichment in HEK293T/Cas9 cells. 50 sites were sequence-confirmed as edited and nominated by three genome-wide assays (true positive). 158 sites were nominated by all three genome-wide assays but were not sequence-confirmed as edited (potential false negatives of hybrid capture). One site, a potential false positive of the sequence-confirmation step, was sequence-confirmed but not nominated by any genome-wide assay. Distribution of edit distances was statistically significantly different between true positives and
