# Supplementary material for: Evaluation of Homology-Independent CRISPR-Cas9 Off-Target Assessment Methods
Source: PubMed Central journal article supplement — CRISPR J. 2020 Dec 18;3(6):440–53. doi: 10.1089/crispr.2020.0053 (PMC7757695; doi:10.1089/crispr.2020.0053), 2020-12-18
Supplement: Supp_FigS10.pdf [file Supp_FigS10.pdf]

**A**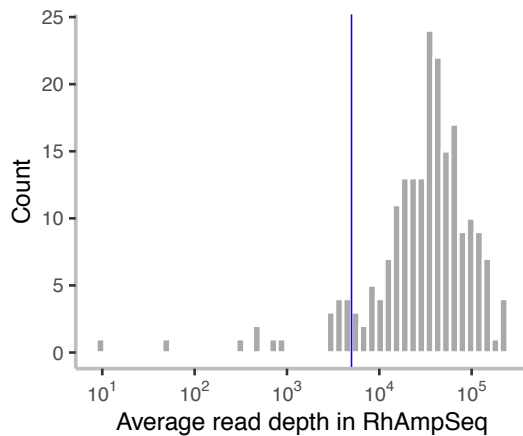**B**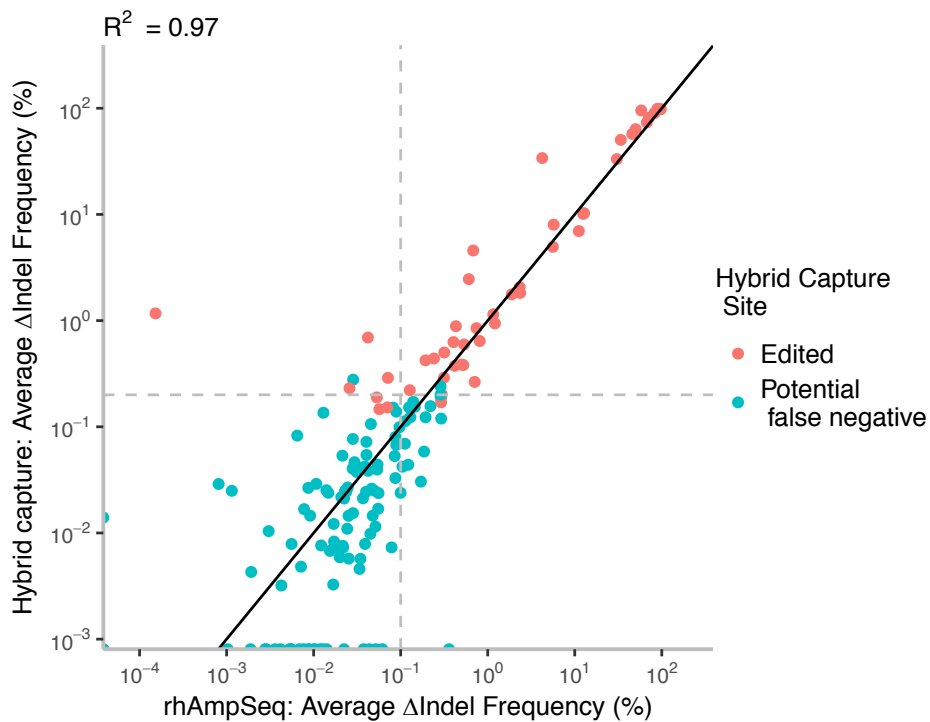

**Supplementary Fig. S10: A)** Average read depth obtained in rhAmpSeq amplicon sequencing on 207 sites in three replicates of treated and untreated samples (9 on-target sites, 40 sequence-confirmed off-target sites, and 152 potential false negatives of sequence confirmation step). Blue line denotes 5000 reads. **B)** Correlation between average difference in indel frequency measured by rhAmpSeq and hybrid capture for 201 sites with greater than 500 average read depth. Red points denote sites that were sequence-confirmed as edited by hybrid capture; blue points denote sites that were nominated by all three genome-wide assays but found to be unedited by hybrid capture. Dashed grey lines denote 0.2% indel frequency difference. Black line denotes  $y = x$ . The outlier (edited site, near the y-axis) is a potential false positive of the hybrid capture assay described in Supplementary Fig. S7.
