# Supplementary material for: Evaluation of Homology-Independent CRISPR-Cas9 Off-Target Assessment Methods
Source: PubMed Central journal article supplement — CRISPR J. 2020 Dec 18;3(6):440–53. doi: 10.1089/crispr.2020.0053 (PMC7757695; doi:10.1089/crispr.2020.0053), 2020-12-18
Supplement: Supp_FigS11.pdf [file Supp_FigS11.pdf]

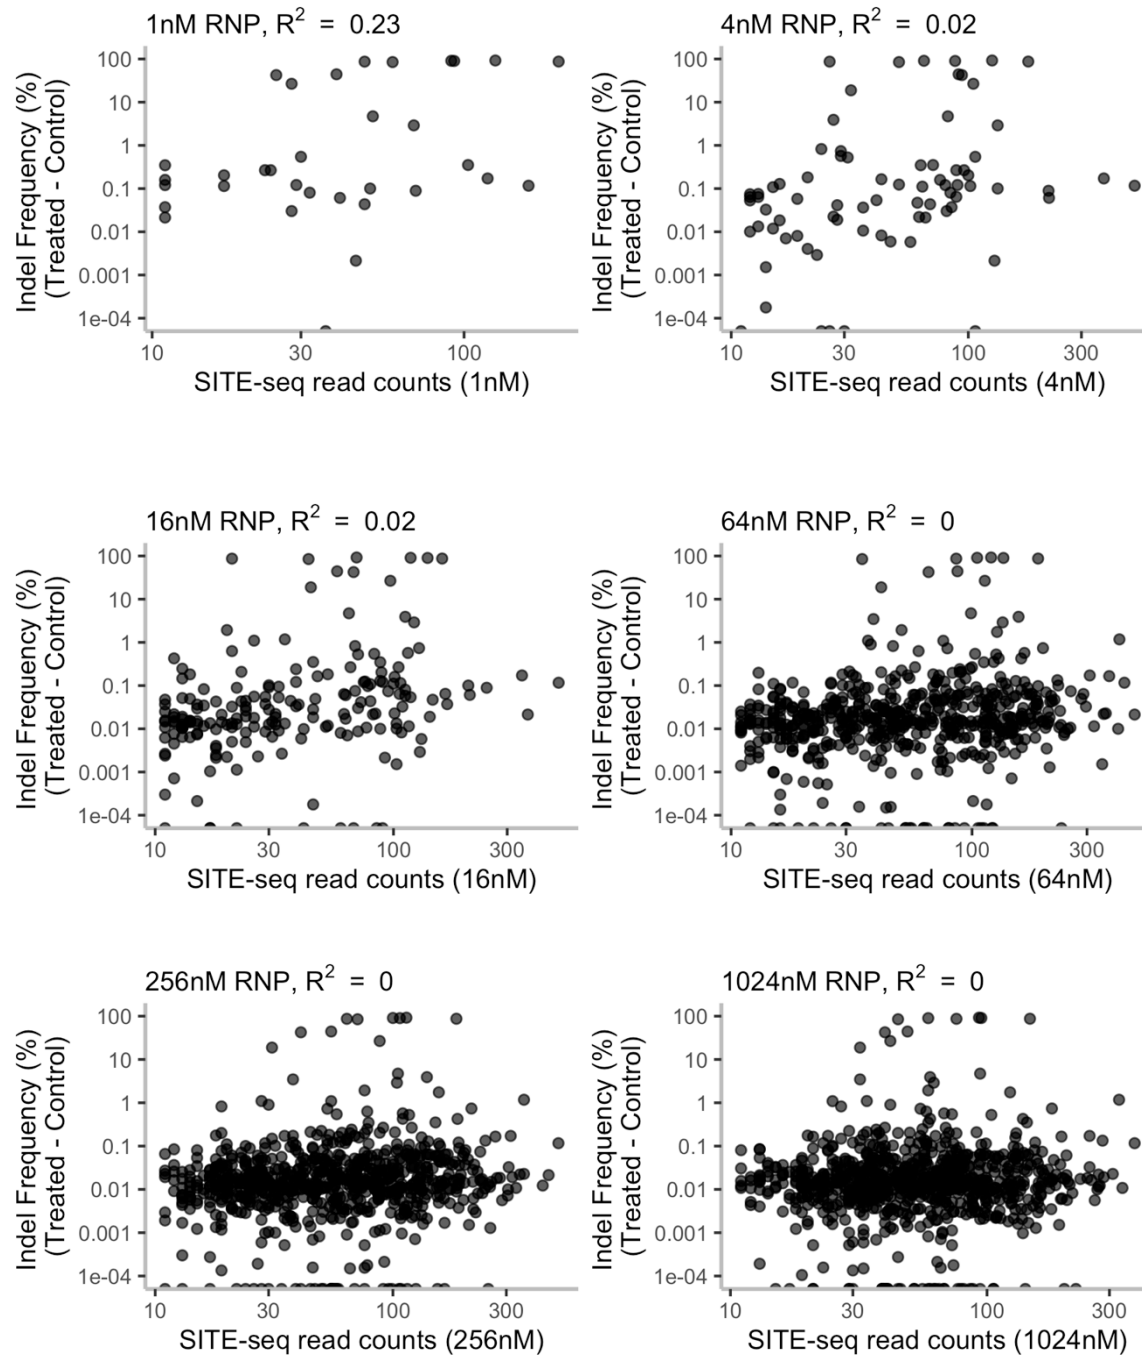

**Supplementary Fig. S11:** Data from Cameron et al, 2017 (Supplementary table 12 – 19: SITE-Seq target sites examined in cell-based validation). Each panel shows a scatter plot with indel frequency differences measured in cells on the y-axis and number of SITE-seq counts at a certain RNP concentration on the x-axis. Indel frequencies were measured in HEK293-Cas9 cells using targeted amplicon sequencing after three days of exposure to Cas9-gRNA. A total of 1,451 sites were evaluated across 7 gRNAs by Cameron et al.
