# Supplementary material for: Evaluation of Homology-Independent CRISPR-Cas9 Off-Target Assessment Methods
Source: PubMed Central journal article supplement — CRISPR J. 2020 Dec 18;3(6):440–53. doi: 10.1089/crispr.2020.0053 (PMC7757695; doi:10.1089/crispr.2020.0053), 2020-12-18
Supplement: Supp_TableS1.pdf [file Supp_TableS1.pdf]

**Supplementary Table S1:** dsODN source and sequence used this study

| <b>Vendor</b>               | <b>Oligo Name</b>                | <b>Sequence</b>                                          | <b>Modifications</b>                         | <b>Purification</b> |
|-----------------------------|----------------------------------|----------------------------------------------------------|----------------------------------------------|---------------------|
| Integrated DNA Technologies | GUIDE-seq dsODN oligo sense      | 5'- P-<br>G*T*TTAATTGAGTTGTCATA<br>TGTTAATAACGGT*A*T -3' | *<br>Phosphorothioate;<br>5'-Phosphate group | HPLC                |
|                             | GUIDE-seq dsODN oligo anti-sense | 5'- P-<br>A*T*ACCGTTATTAACATAT<br>GACAACTCAATTAA*A*C -3' | *Phosphorothioate;<br>5'-Phosphate group     | HPLC                |
