# Supplementary material for: Evaluation of Homology-Independent CRISPR-Cas9 Off-Target Assessment Methods
Source: PubMed Central journal article supplement — CRISPR J. 2020 Dec 18;3(6):440–53. doi: 10.1089/crispr.2020.0053 (PMC7757695; doi:10.1089/crispr.2020.0053), 2020-12-18
Supplement: Supp_TableS2.pdf [file Supp_TableS2.pdf]

**Supplementary Table S2:** Sequence and manufacturer of synthesized gRNAs used this study

| <b>gRNA Name</b> | <b>gRNA sequence*</b>                                                                                                | <b>Manufacturer</b> |
|------------------|----------------------------------------------------------------------------------------------------------------------|---------------------|
| IL2RG            | 5'usgsgsUAAUGAUGGCUUCAACAGUUUUAGAGCUAGAA<br>AUAGCAAGUUAAAAUAAGGCUAGUCCGUUAUCAACUU<br>GAAAAAGUGGCACCGAGUCGGUGCususU3' | TriLink             |
| CCR5             | 5'gsusgsUUCAUCUUUGGUUUUGUGUUUUAGAGCUAGAA<br>AUAGCAAGUUAAAAUAAGGCUAGUCCGUUAUCAACUU<br>GAAAAAGUGGCACCGAGUCGGUGCususU3' | TriLink             |
| FANCF            | 5'gsgsasAUCCCUUCUGCAGCACCGUUUUAGAGCUAGAA<br>AUAGCAAGUUAAAAUAAGGCUAGUCCGUUAUCAACUU<br>GAAAAAGUGGCACCGAGUCGGUGCususU3' | AxoLabs             |
| HEK1             | 5'gsgsgsAAAGACCCAGCAUCCGUGUUUUAGAGCUAGAA<br>AUAGCAAGUUAAAAUAAGGCUAGUCCGUUAUCAACUU<br>GAAAAAGUGGCACCGAGUCGGUGCususU3' | AxoLabs             |
| HEK2             | 5'gsasasCACAAAGCAUAGACUGCGUUUUAGAGCUAGAA<br>AUAGCAAGUUAAAAUAAGGCUAGUCCGUUAUCAACUU<br>GAAAAAGUGGCACCGAGUCGGUGCususU3' | AxoLabs             |
| HEK3             | 5'gsgscsCCAGACUGAGCACGUGAGUUUUAGAGCUAGAA<br>AUAGCAAGUUAAAAUAAGGCUAGUCCGUUAUCAACUU<br>GAAAAAGUGGCACCGAGUCGGUGCususU3' | AxoLabs             |
| RNF2             | 5'gsuscsAUCUUAGUCAUUACCGUUUUAGAGCUAGAA<br>AUAGCAAGUUAAAAUAAGGCUAGUCCGUUAUCAACUU<br>GAAAAAGUGGCACCGAGUCGGUGCususU3'   | AxoLabs             |
| VEGFA1           | 5'gsgsgsUGGGGGGAGUUUGCUCGGUUUUAGAGCUAGAA<br>AUAGCAAGUUAAAAUAAGGCUAGUCCGUUAUCAACUU<br>GAAAAAGUGGCACCGAGUCGGUGCususU3' | AxoLabs             |

\* a, c, g, u: 2'-O-methyl residues; s: phosphorothioate
