# Supplementary material for: Evaluation of Homology-Independent CRISPR-Cas9 Off-Target Assessment Methods
Source: PubMed Central journal article supplement — CRISPR J. 2020 Dec 18;3(6):440–53. doi: 10.1089/crispr.2020.0053 (PMC7757695; doi:10.1089/crispr.2020.0053), 2020-12-18
Supplement: Supp_TableS3.pdf [file Supp_TableS3.pdf]

**Supplementary Table S3:** Number of sites nominated by one or more replicates of GUIDE-seq across all eight gRNAs in HEK293T/Cas9 cells.

| <b>gRNA</b> | <b>Unique to<br/>1 replicate</b> | <b>Shared by<br/>any 2 reps</b> | <b>Shared by<br/>all 3 reps</b> | <b>Total</b> | <b>Percentage<br/>in three<br/>replicates</b> |
|-------------|----------------------------------|---------------------------------|---------------------------------|--------------|-----------------------------------------------|
| CCR5        | 7                                | 1                               | 3                               | 11           | 27.3                                          |
| FANCF       | 11                               | 7                               | 7                               | 25           | 28.0                                          |
| HEK1        | 9                                | 7                               | 9                               | 25           | 36.0                                          |
| HEK2        | 12                               | 0                               | 4                               | 16           | 25.0                                          |
| HEK3        | 7                                | 3                               | 8                               | 18           | 44.4                                          |
| IL2RG       | 25                               | 9                               | 12                              | 46           | 26.1                                          |
| RNF2        | 16                               | 4                               | 6                               | 26           | 23.1                                          |
| VEGFA1      | 65                               | 42                              | 46                              | 153          | 30.1                                          |
| Average     | 19                               | 9.1                             | 11.9                            | 40           | 30.0                                          |
