# Supplementary material for: Evaluation of Homology-Independent CRISPR-Cas9 Off-Target Assessment Methods
Source: PubMed Central journal article supplement — CRISPR J. 2020 Dec 18;3(6):440–53. doi: 10.1089/crispr.2020.0053 (PMC7757695; doi:10.1089/crispr.2020.0053), 2020-12-18
Supplement: Supp_TableS4.pdf [file Supp_TableS4.pdf]

**Supplementary Table S4:** Number of sites nominated by one or more replicates of CIRCLE-seq across all eight gRNAs

| <b>gRNA</b> | <b>Unique to<br/>1 replicate</b> | <b>Shared by<br/>any 2 reps</b> | <b>Shared by<br/>all 3 reps</b> | <b>Total</b> | <b>Percentage<br/>in three<br/>replicates</b> |
|-------------|----------------------------------|---------------------------------|---------------------------------|--------------|-----------------------------------------------|
| CCR5        | 2387                             | 200                             | 1606                            | 4193         | 38.3                                          |
| FANCF       | 271                              | 68                              | 2723                            | 3062         | 88.9                                          |
| HEK1        | 496                              | 93                              | 1744                            | 2333         | 74.8                                          |
| HEK2        | 3790                             | 833                             | 4783                            | 9406         | 50.9                                          |
| HEK3        | 2603                             | 619                             | 3026                            | 6248         | 48.4                                          |
| IL2RG       | 536                              | 234                             | 5794                            | 6564         | 88.3                                          |
| RNF2        | 104                              | 41                              | 1473                            | 1618         | 91.0                                          |
| VEGFA1      | 219                              | 139                             | 8176                            | 8534         | 95.8                                          |
| Average     | 1300.8                           | 278.4                           | 3665.6                          | 5244.8       | 72.0                                          |
