# Supplementary material for: Evaluation of Homology-Independent CRISPR-Cas9 Off-Target Assessment Methods
Source: PubMed Central journal article supplement — CRISPR J. 2020 Dec 18;3(6):440–53. doi: 10.1089/crispr.2020.0053 (PMC7757695; doi:10.1089/crispr.2020.0053), 2020-12-18
Supplement: Supp_TableS5.pdf [file Supp_TableS5.pdf]

**Supplementary Table S5:** Number of sites nominated by one or more replicates of SITE-seq across all eight gRNAs

| <b>gRNA</b> | <b>Unique to<br/>1 replicate</b> | <b>Shared by<br/>any 2 reps</b> | <b>Shared by<br/>all 3 reps</b> | <b>Total</b> | <b>Percentage<br/>in three<br/>replicates</b> |
|-------------|----------------------------------|---------------------------------|---------------------------------|--------------|-----------------------------------------------|
| CCR5        | 108                              | 68                              | 290                             | 466          | 62.2                                          |
| FANCF       | 235                              | 132                             | 652                             | 1019         | 64.0                                          |
| HEK1        | 345                              | 171                             | 611                             | 1127         | 54.2                                          |
| HEK2        | 349                              | 222                             | 753                             | 1324         | 56.9                                          |
| HEK3        | 201                              | 133                             | 525                             | 859          | 61.1                                          |
| IL2RG       | 938                              | 626                             | 2395                            | 3959         | 60.5                                          |
| RNF2        | 347                              | 222                             | 709                             | 1278         | 55.5                                          |
| VEGFA1      | 1145                             | 929                             | 4639                            | 6713         | 69.1                                          |
| Average     | 458.5                            | 312.9                           | 1321.8                          | 2093.1       | 60.4                                          |
