# Supplementary material for: Evaluation of Homology-Independent CRISPR-Cas9 Off-Target Assessment Methods
Source: PubMed Central journal article supplement — CRISPR J. 2020 Dec 18;3(6):440–53. doi: 10.1089/crispr.2020.0053 (PMC7757695; doi:10.1089/crispr.2020.0053), 2020-12-18
Supplement: Supp_TableS6.pdf [file Supp_TableS6.pdf]

**Supplementary Table S6:** Overlap between GUIDE-seq nominated sites and CIRCLE-seq nominated sites

|                                                                |   | Number of sites nominated by 1, 2 or 3 replicates of CIRCLE-seq |       |      |       |
|----------------------------------------------------------------|---|-----------------------------------------------------------------|-------|------|-------|
|                                                                |   | 0                                                               | 1     | 2    | 3     |
| Number of sites nominated by 1, 2 or 3 replicates of GUIDE-seq | 0 |                                                                 | 10406 | 2226 | 29051 |
|                                                                | 1 | 41                                                              | 0     | 1    | 110   |
|                                                                | 2 | 2                                                               | 0     | 0    | 71    |
|                                                                | 3 | 2                                                               | 0     | 0    | 93    |
