# Supplementary material for: Evaluation of Homology-Independent CRISPR-Cas9 Off-Target Assessment Methods
Source: PubMed Central journal article supplement — CRISPR J. 2020 Dec 18;3(6):440–53. doi: 10.1089/crispr.2020.0053 (PMC7757695; doi:10.1089/crispr.2020.0053), 2020-12-18
Supplement: Supp_TableS7.pdf [file Supp_TableS7.pdf]

**Supplementary Table S7:** Overlap between GUIDE-seq nominated sites and SITE-seq nominated sites

|                                                                |   | Number of sites nominated by 1, 2 or 3 replicates of SITE-seq |      |      |       |
|----------------------------------------------------------------|---|---------------------------------------------------------------|------|------|-------|
|                                                                |   | 0                                                             | 1    | 2    | 3     |
| Number of sites nominated by 1, 2 or 3 replicates of GUIDE-seq | 0 |                                                               | 3663 | 2498 | 10311 |
|                                                                | 1 | 42                                                            | 4    | 3    | 103   |
|                                                                | 2 | 4                                                             | 1    | 2    | 66    |
|                                                                | 3 | 1                                                             | 0    | 0    | 94    |
