# Supplementary material for: Evaluation of Homology-Independent CRISPR-Cas9 Off-Target Assessment Methods
Source: PubMed Central journal article supplement — CRISPR J. 2020 Dec 18;3(6):440–53. doi: 10.1089/crispr.2020.0053 (PMC7757695; doi:10.1089/crispr.2020.0053), 2020-12-18
Supplement: Supp_TableS8.pdf [file Supp_TableS8.pdf]

**Supplementary Table S8:** Overlap between CIRCLE-seq nominated sites and SITE-seq nominated sites

|                                                                 |   | Number of sites nominated by 1, 2 or 3 replicates of SITE-seq |      |      |      |
|-----------------------------------------------------------------|---|---------------------------------------------------------------|------|------|------|
|                                                                 |   | 0                                                             | 1    | 2    | 3    |
| Number of sites nominated by 1, 2 or 3 replicates of CIRCLE-seq | 0 |                                                               | 1540 | 742  | 1339 |
|                                                                 | 1 | 10394                                                         | 8    | 1    | 3    |
|                                                                 | 2 | 2167                                                          | 25   | 10   | 25   |
|                                                                 | 3 | 16273                                                         | 2095 | 1750 | 9207 |
