# Supplementary material for: Evaluation of Homology-Independent CRISPR-Cas9 Off-Target Assessment Methods
Source: PubMed Central journal article supplement — CRISPR J. 2020 Dec 18;3(6):440–53. doi: 10.1089/crispr.2020.0053 (PMC7757695; doi:10.1089/crispr.2020.0053), 2020-12-18
Supplement: Supp_TableS9.pdf [file Supp_TableS9.pdf]

**Supplementary Table S9:** Impact of hybrid capture parameters on number of sites sequence-confirmed as edited. Read depth threshold was varied from 100 to 500 reads. Benjamini-Hochberg adjusted CMH *P*-value threshold was varied from 0.05 to 0.15. An additional site was observed when the Benjamini-Hochberg adjusted CMH *P*-value threshold was raised to 0.15 at 500 read depth threshold. This site had an average frequency difference of 0.201% between treated and control samples.

| <b>Read depth threshold</b> | <b>Number of sites sequenced above threshold</b> | <b>Multiple hypothesis correction</b> | <b>BH adjusted CMH <i>P</i>-value threshold</b> | <b>Number of sites edited</b> |
|-----------------------------|--------------------------------------------------|---------------------------------------|-------------------------------------------------|-------------------------------|
| 500                         | 66165                                            | Benjamini-Hochberg                    | 0.05                                            | 51                            |
| 400                         | 67771                                            | Benjamini-Hochberg                    | 0.05                                            | 51                            |
| 300                         | 69454                                            | Benjamini-Hochberg                    | 0.05                                            | 51                            |
| 200                         | 71230                                            | Benjamini-Hochberg                    | 0.05                                            | 51                            |
| 100                         | 73174                                            | Benjamini-Hochberg                    | 0.05                                            | 51                            |
| 500                         | 66165                                            | Benjamini-Hochberg                    | 0.1                                             | 51                            |
| 500                         | 66165                                            | Benjamini-Hochberg                    | 0.15                                            | 52                            |
