# Supplementary material for: Evaluation of Homology-Independent CRISPR-Cas9 Off-Target Assessment Methods
Source: PubMed Central journal article supplement — CRISPR J. 2020 Dec 18;3(6):440–53. doi: 10.1089/crispr.2020.0053 (PMC7757695; doi:10.1089/crispr.2020.0053), 2020-12-18
Supplement: Supp_TableS10.pdf [file Supp_TableS10.pdf]

**Supplementary Table S10:** Intersection of sites sequence-confirmed as edited by hybrid capture sequencing in HEK293T/Cas9 cells with sites nominated by 1, 2 or 3 replicates of GUIDE-seq, CIRCLE-seq and SITE-seq.

| Number of sequence-confirmed sites by hybrid capture sequencing in HEK293T/Cas9 cells | Nominated by number of replicates of |            |          | Annotation       |
|---------------------------------------------------------------------------------------|--------------------------------------|------------|----------|------------------|
|                                                                                       | GUIDE-seq                            | CIRCLE-seq | SITE-seq |                  |
| 45                                                                                    | 3                                    | 3          | 3        | All three assays |
| 2                                                                                     | 2                                    | 3          | 3        | All three assays |
| 2                                                                                     | 1                                    | 3          | 3        | All three assays |
| 1                                                                                     | 1                                    | 0          | 3        | Two assays       |
| 1                                                                                     | 0                                    | 0          | 0        | No assay         |
