# Supplementary material for: Evaluation of Homology-Independent CRISPR-Cas9 Off-Target Assessment Methods
Source: PubMed Central journal article supplement — CRISPR J. 2020 Dec 18;3(6):440–53. doi: 10.1089/crispr.2020.0053 (PMC7757695; doi:10.1089/crispr.2020.0053), 2020-12-18
Supplement: Supp_TableS11.pdf [file Supp_TableS11.pdf]

**Supplementary Table S11:** Number of sites nominated by the three genome-wide methods outside of up to 5 MM 0 gap, or up to 3 MM 1 gap homology space but within 7 MM, 5 gap space

| <b>gRNA</b> | <b>GUIDE-seq</b> | <b>CIRCLE-seq</b> | <b>SITE-seq</b> |
|-------------|------------------|-------------------|-----------------|
| CCR5        | 5                | 3083              | 154             |
| FANCF       | 5                | 2309              | 617             |
| HEK1        | 6                | 1771              | 782             |
| HEK2        | 6                | 7907              | 829             |
| HEK3        | 8                | 5721              | 570             |
| IL2RG       | 13               | 5425              | 3153            |
| RNF2        | 14               | 1216              | 970             |
| VEGFA1      | 37               | 7504              | 5908            |
