# Supplementary material for: Evaluation of Homology-Independent CRISPR-Cas9 Off-Target Assessment Methods
Source: PubMed Central journal article supplement — CRISPR J. 2020 Dec 18;3(6):440–53. doi: 10.1089/crispr.2020.0053 (PMC7757695; doi:10.1089/crispr.2020.0053), 2020-12-18
Supplement: Supp_TableS12.pdf [file Supp_TableS12.pdf]

**Supplementary Table S12:** Number of sites sequenced with at least 500 read counts in the second round of hybrid capture followed by sequencing. Sites were selected from sites nominated by the three genome-wide methods within the 6 MM 3 gap space for CCR5, RNF2, HEK1 and HEK3 gRNAs, with additional 82 sites included from homology-dependent nomination.

|                   |          | <b>Gaps</b> |          |          |          |
|-------------------|----------|-------------|----------|----------|----------|
|                   |          | <b>0</b>    | <b>1</b> | <b>2</b> | <b>3</b> |
| <b>Mismatches</b> | <b>0</b> | 5           | 1        | 3        | 6        |
|                   | <b>1</b> | 1           | 4        | 35       | 17       |
|                   | <b>2</b> | 1           | 8        | 134      | 23       |
|                   | <b>3</b> | 10          | 64       | 143      | 6        |
|                   | <b>4</b> | 81          | 689      | 97       | 2        |
|                   | <b>5</b> | 315         | 461      | 35       | 2        |
|                   | <b>6</b> | 487         | 161      | 25       | 2        |
